# Supplementary material for: The gas-phase infrared spectra of the 2-methylallyl radical and its high-temperature reaction products
Source: Royal Society of Chemistry journal article supplement (doi:10.1039/d2cp00400c), 2022-01-01
Supplement: d2cp00400c1.pdf [file d2cp00400c1.pdf]

Electronic Supplementary Information for

**The gas-phase infrared spectra of the 2-methylallyl radical  
and its high-temperature reaction products**

Tobias Preitschopf,<sup>a</sup> Florian Hirsch,<sup>a</sup> Alexander Lemmens,<sup>b</sup> Anouk M. Rijs <sup>\*b</sup> and Ingo Fischer <sup>\*a</sup>

<sup>a</sup> Institute of Physical and Theoretical Chemistry, University of Würzburg, Am Hubland,  
97074 Würzburg, Germany. E-mail: ingo.fischer@uni-wuerzburg.de.

<sup>b</sup> Radboud University, Institute for Molecules and Materials, FELIX Laboratory, Toernooiveld 7,  
6525 ED Nijmegen, The Netherlands. E-mail: a.m.rijs@vu.nl.

| <b>Spectrum</b>                                              | <b>Page</b> |
|--------------------------------------------------------------|-------------|
| IR/UV spectrum of $m/z=120$                                  | S2          |
| 118 nm TOF mass spectrum recorded with and without pyrolysis | S3          |
| Breakdown diagram of 3-bromo-2-methylpropene                 | S4          |
| Mass-selected threshold photoelectron spectrum of $m/z=70$   | S5          |
| Mass-selected threshold photoelectron spectrum of $m/z=68$   | S6          |
| Mass-selected threshold photoelectron spectrum of $m/z=39$   | S7          |
| IR/UV spectrum of $m/z=106$                                  | S8          |
| Mass-selected threshold photoelectron spectrum of $m/z=78$   | S9          |
| Mass-selected threshold photoelectron spectrum of $m/z=104$  | S10         |
| IR/UV Spectrum of $m/z=92$                                   | S11         |
| The IR/UV spectrum of $m/z=118$                              | S12         |
| Literature                                                   | S13         |

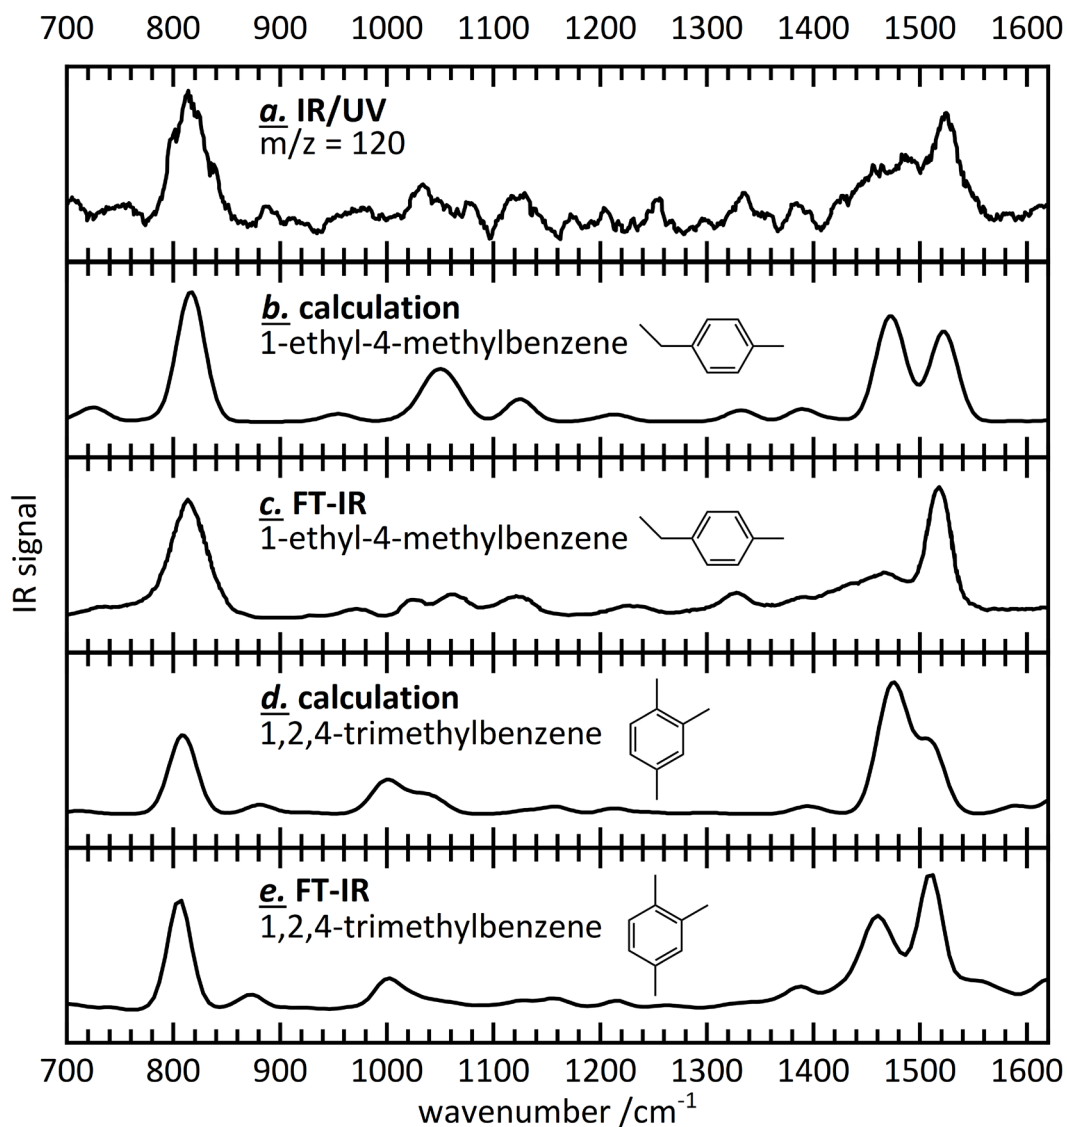

**Fig. S.1** IR/UV spectrum of  $m/z=120$  (trace a.) in comparison to computed IR spectra of 1-ethyl-4-methylbenzene (b.) and 1,2,4-trimethylbenzene (d.). Both computations overestimate the intensities of the bands at around 1470 cm<sup>-1</sup>. To substantiate the assignments, gas-phase FT-IR spectra were recorded, and excellent agreement is observed between the IR/UV data and the FT-IR spectrum of 1-ethyl-4-methylbenzene (c.).

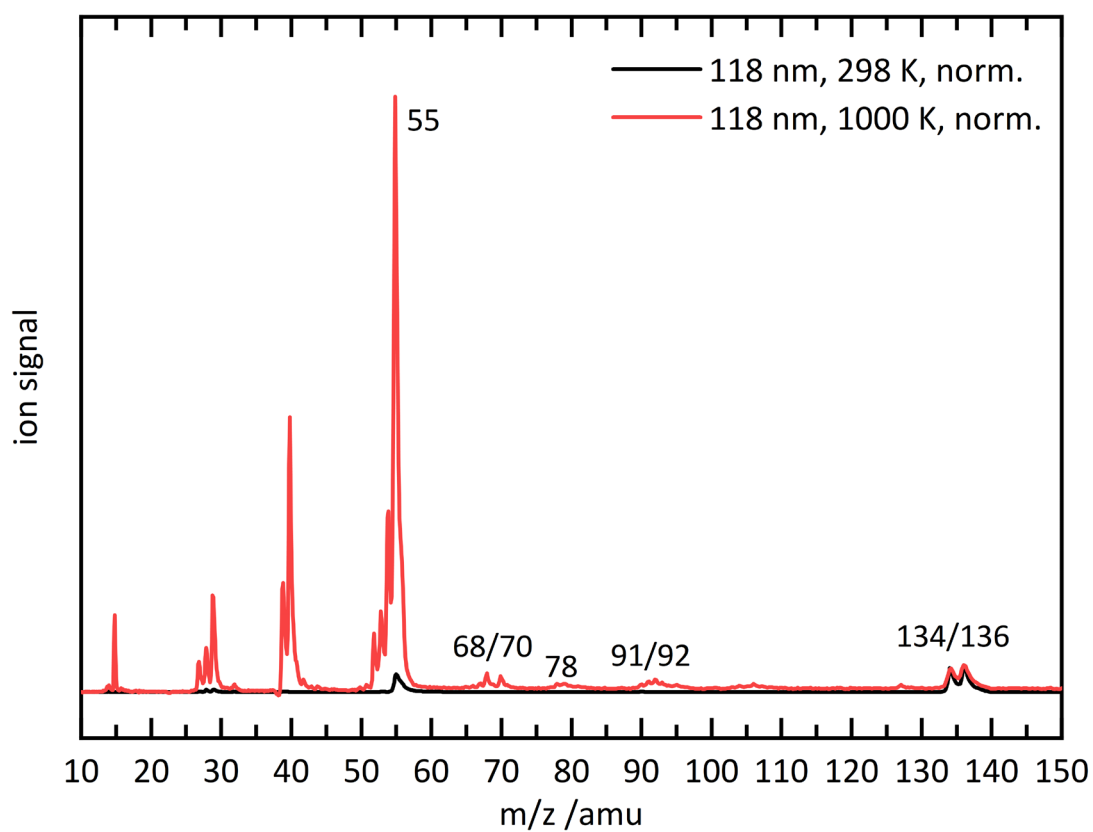

**Fig. S. 2** 118 nm TOF mass spectra recorded with (1000 K) and without (298 K) pyrolysis showing only small contributions of dissociative photoionization.

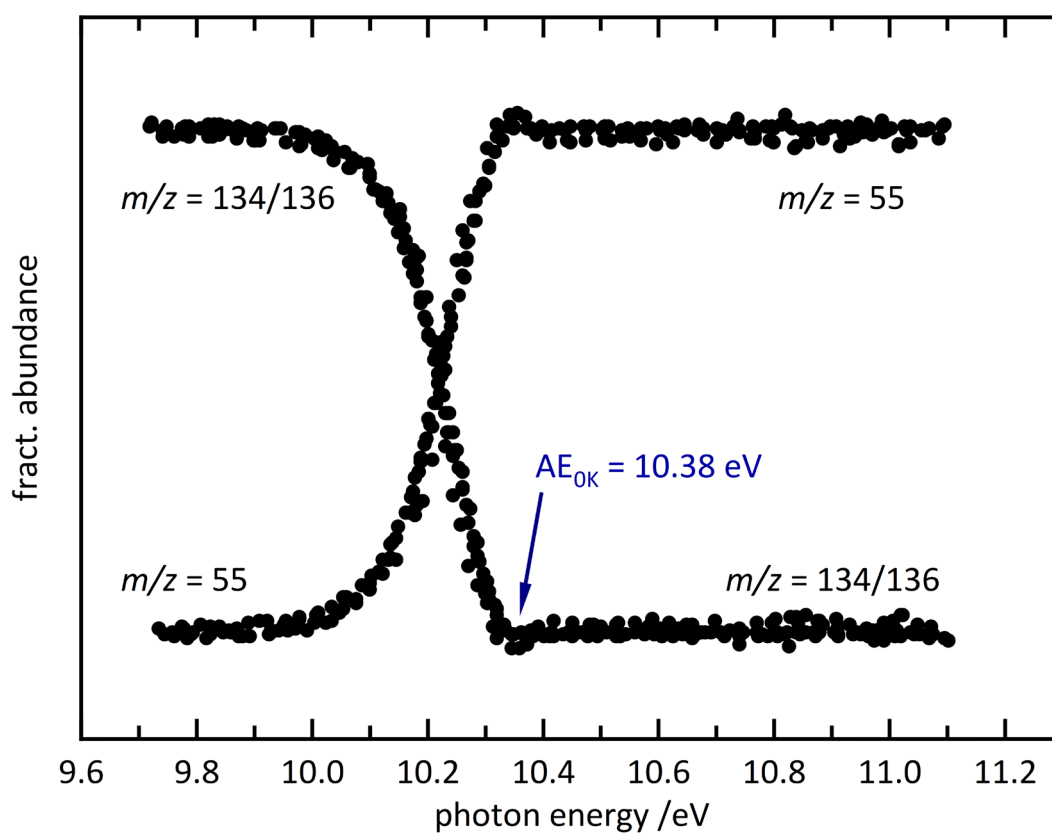

**Fig. S. 3** Breakdown diagram of 3-bromo-2-methylpropene, taken from Ref. 1 yielding an  $AE_{0K}(\text{C}_4\text{H}_7\text{Br}, \text{C}_4\text{H}_7^+) = 10.38 \text{ eV}$ .

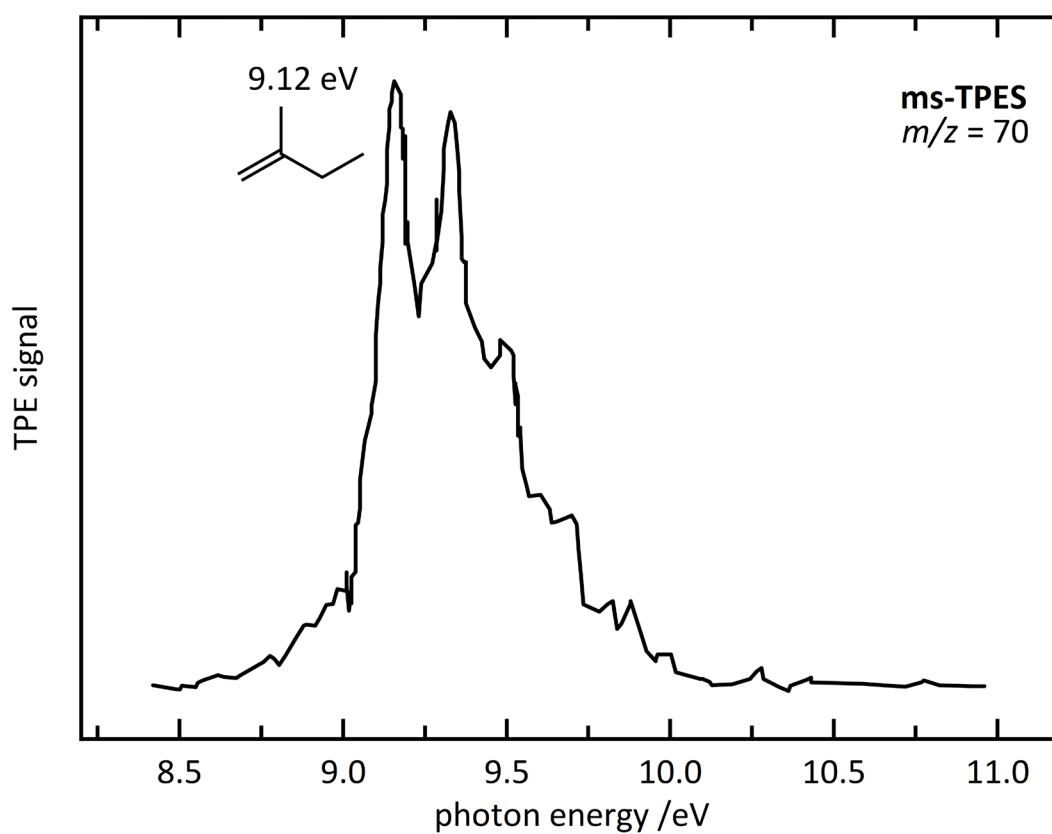

**Fig. S. 4** Mass-selected threshold photoelectron spectrum (TPES) of  $m/z=70$  recorded under comparable experimental conditions in the pyrolysis of 3-bromo-2-methylpropene.<sup>1</sup> 2-Methyl-1-butene is identified based on a comparison with a literature spectrum.<sup>2</sup>

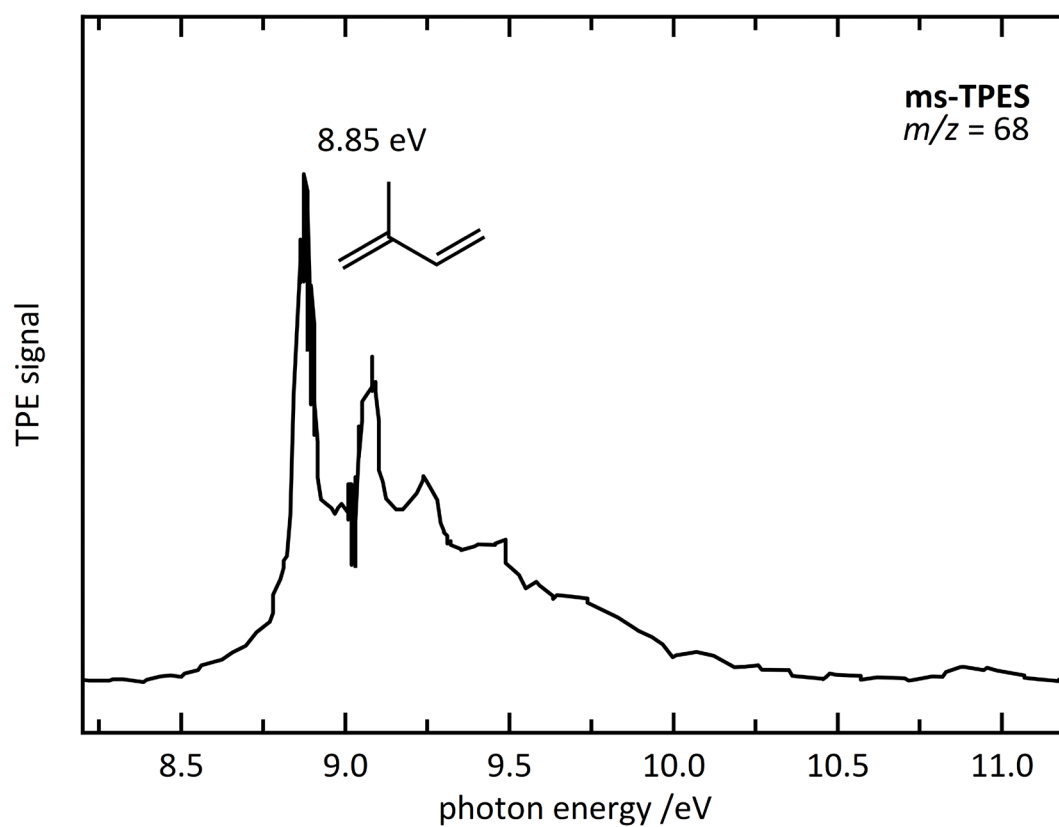

**Fig. S. 5** Mass-selected threshold photoelectron spectrum (TPES) of  $m/z=68$  recorded under comparable experimental conditions in the pyrolysis of 3-bromo-2-methylpropene.<sup>1</sup> 2-Methyl-1,3-butadiene (isoprene) is identified by comparison with a published photoelectron spectrum.<sup>3</sup>

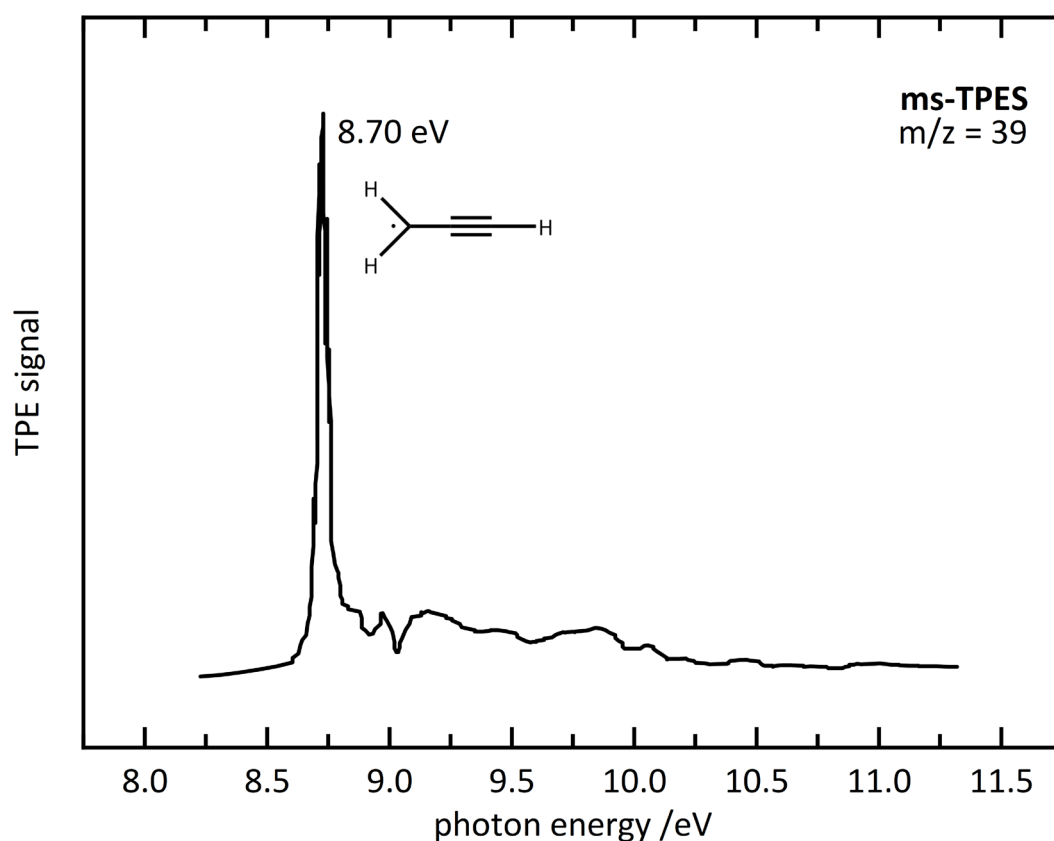

**Fig. S. 6** Mass-selected threshold photoelectron spectrum of  $m/z=39$  recorded under comparable experimental conditions of the pyrolysis of 3-bromo-2-methylpropene.<sup>1</sup> Propargyl is identified based on the comparison with a previous TPES.<sup>4</sup>

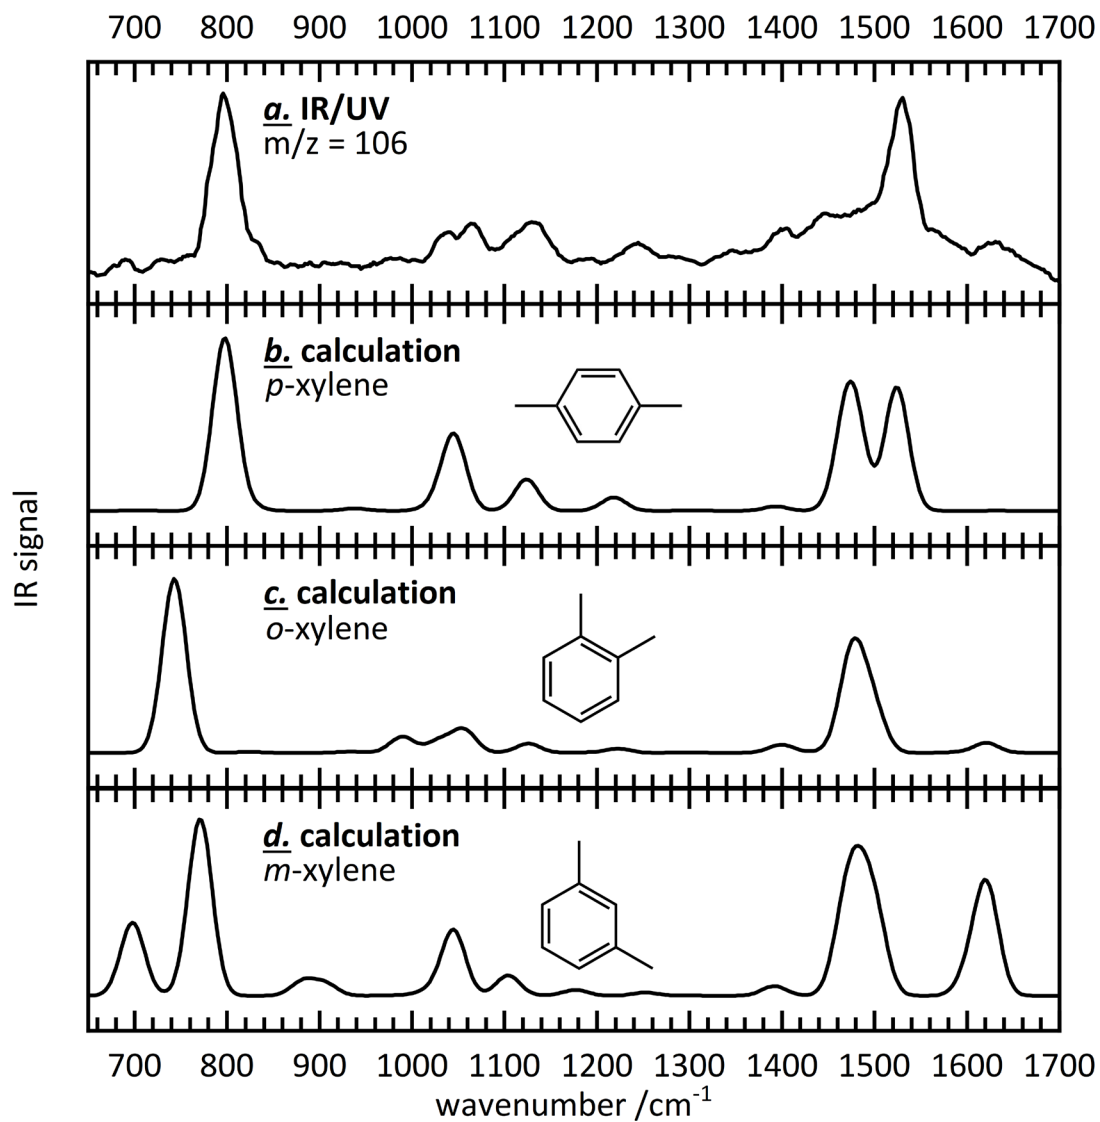

**Fig. S. 7** The IR/UV spectrum of  $m/z=106$  (trace a.) in comparison with computed IR spectra of para-, ortho- and meta-xylene (traces b.-d.). The carrier of the experimental spectrum is unambiguously identified as para-xylene. All computations predict the band positions well but overestimate the intensities of a few bands. To substantiate the assignment, a gas-phase FT-IR spectra was recorded (see Fig. 3.b.), and excellent agreement is observed.



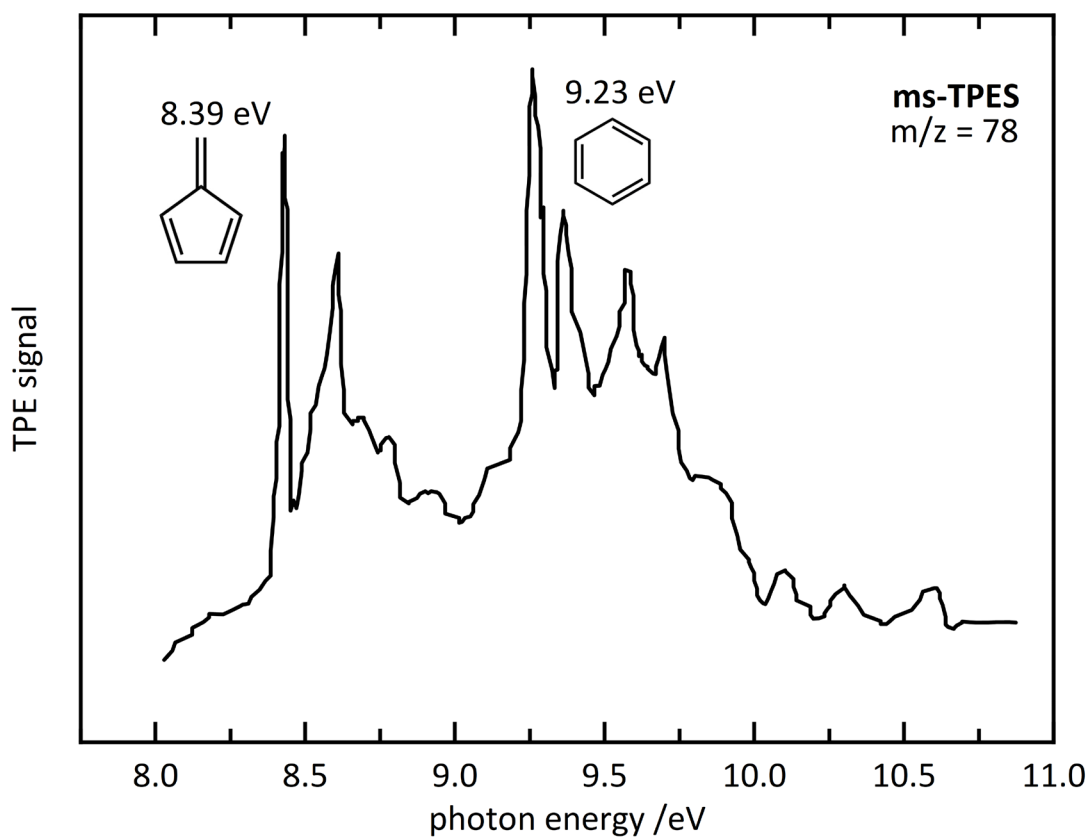

**Fig. S.8** Mass-selected threshold photoelectron spectrum (TPES) of  $m/z=78$  recorded under comparable experimental conditions in the pyrolysis of 3-bromo-2-methylpropene.<sup>1</sup> The two isomers fulvene and benzene are identified based on their ionization energies<sup>5</sup> as well as a previous TPES.<sup>6</sup>

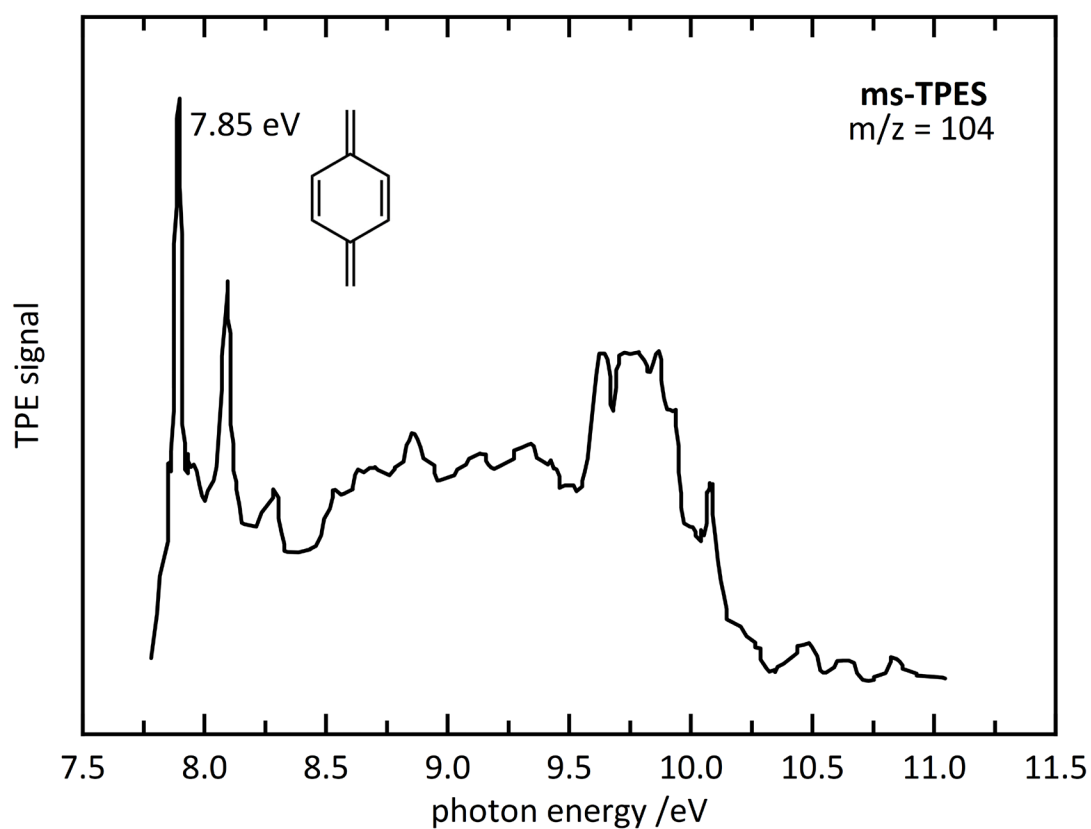

**Fig. S.9** Mass-selected threshold photoelectron spectrum of  $m/z=104$  recorded under comparable experimental conditions in the pyrolysis of 3-bromo-2-methylpropene.<sup>1</sup> *Para*-xylylene is identified based on its ionization potential and a Franck-Condon simulation.<sup>7</sup>

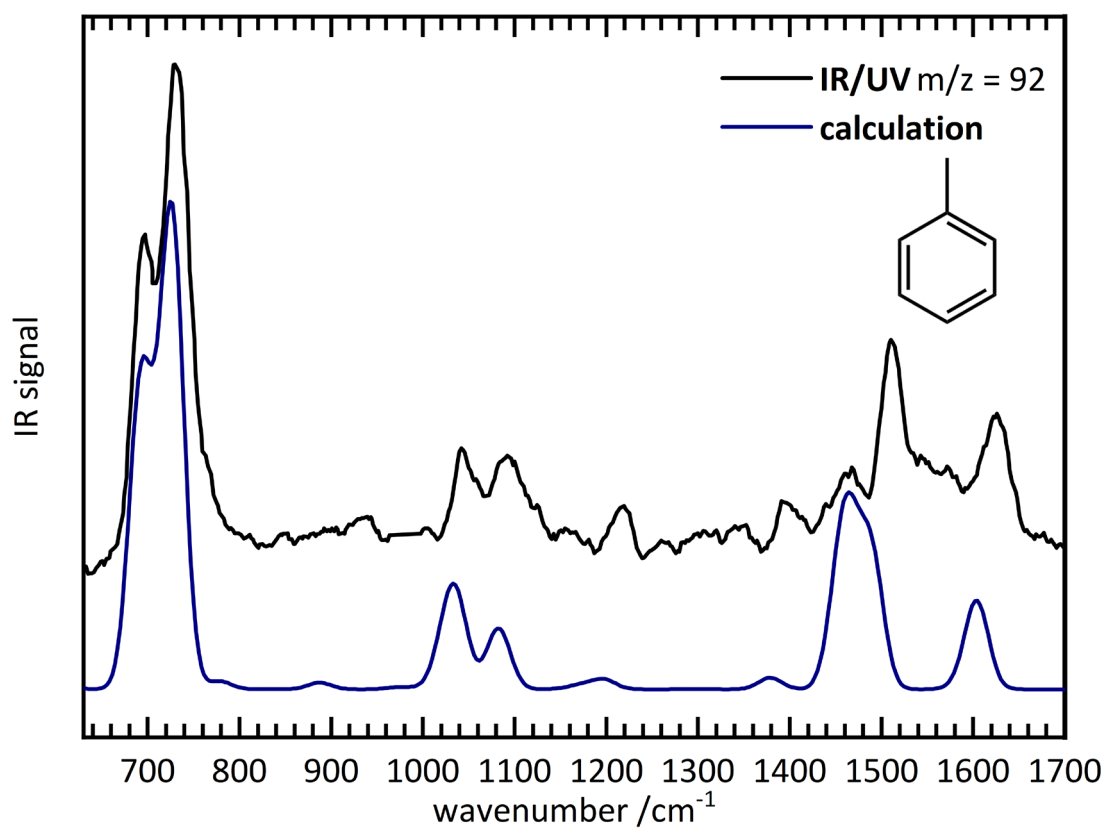

**Fig. S.10** The carrier of the mass signal at  $m/z=92$  is unambiguously identified as toluene by comparison with a computed IR spectrum.

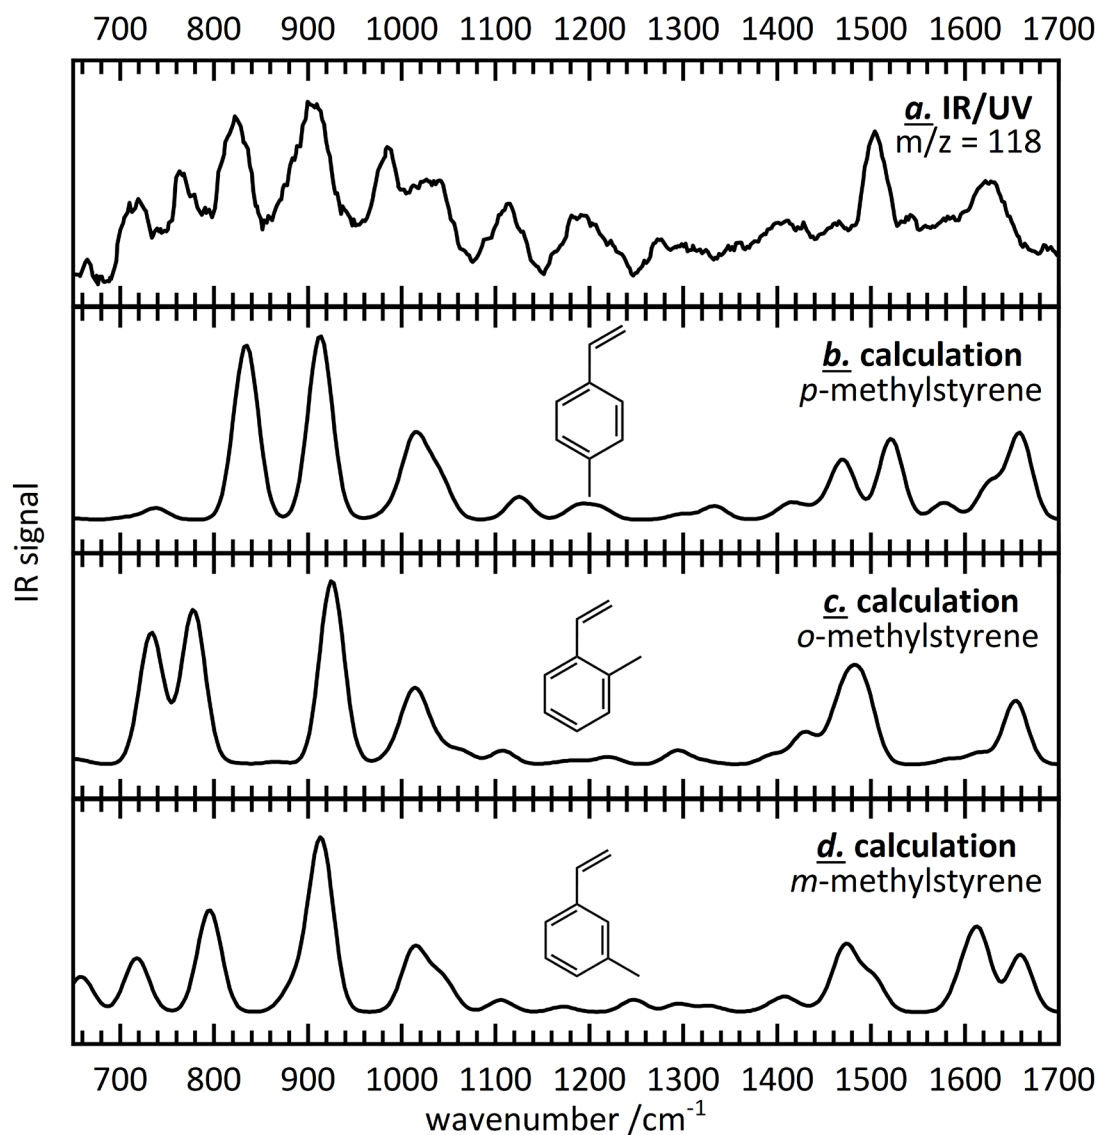

**Fig. S.11** The IR/UV spectrum of  $m/z=118$  (trace a.) in comparison with computed IR spectra of methylated styrene isomers. The formation of *para*- and *ortho*-methylstyrene (traces b. and c.) is confirmed by the experimental data, while signals of the *meta* isomer cannot be identified (d.).

## Literature

1. M. Lang, PhD thesis, University of Wuerzburg, 2015.
2. J. Pieper, S. Schmitt, C. Hemken, E. Davies, J. Wullenkord, A. Brockhinke, J. Kruger, G. A. Garcia, L. Nahon, A. Lucassen, W. Eisfeld and K. Kohse-Hoinghaus, *Z. Phys. Chem.*, 2018, **232**, 153-187.
3. G. Martins, A. M. Ferreira-Rodrigues, F. N. Rodrigues, G. G. B. de Souza, N. J. Mason, S. Eden, D. Duflot, J. P. Flament, S. V. Hoffmann, J. Delwiche, M. J. Hubin-Franskin and P. Limão-Vieira, *Phys. Chem. Chem. Phys.*, 2009, **11**, 11219-11231.
4. P. Hemberger, M. Lang, B. Noller, I. Fischer, C. Alcaraz, B. K. Cunha de Miranda, G. A. Garcia and H. Soldi-Lose, *J. Phys. Chem. A*, 2011, **115**, 2225-2230.
5. E. Heilbronner, R. Gleiter, H. Hopf, V. Hornung and A. de Meijere, *Helv Chim Acta*, 1971, **54**, 783-794.
6. Z. Pan, A. Puente-Urbina, A. Bodi, J. A. van Bokhoven and P. Hemberger, *Chem. Sci.*, 2021, **12**, 3161-3169.
7. P. Hemberger, A. J. Trevitt, T. Gerber, E. Ross and G. da Silva, *J. Phys. Chem. A*, 2014, **118**, 3593-3604.
